# Supplementary material
Source: Springer Nature journal article supplement (https://www.springermedizin.de/resource/supplementary/12985_2010_835_MOESM5_ESM.pdf/9609296)

M 1 2 3 4 5 6 7 N

500 bp  
250 bp

**B**

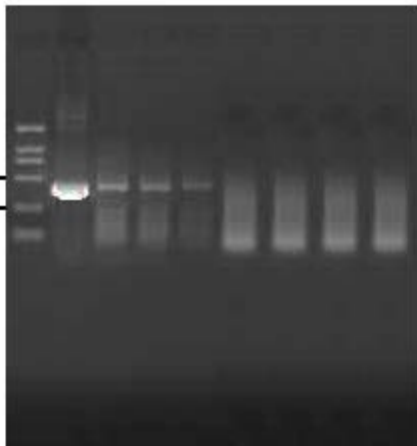

Supplement: MOESM5 [file 9609296]
